# Supplementary material
Source: PubMed Central journal article supplement (PMC6773518)
Supplement: NIHMS1050168-supplement-supplemental_material.pdf [file NIHMS1050168-supplement-supplemental_material.pdf]

## **Supplementary Methods**

### ***Flow Cytometry***

First, cells were stained with live/dead reactive amine dyes as follows: cells were washed once with flow buffer (PBS with 5% FBS and 0.5% sodium azide), decanted and resuspended in 100 $\mu$ L of PBS with violet fluorescent reactive dye (Thermo Fisher Scientific, catalog # L34955) or near IR fluorescent reactive dye (Thermo Fisher Scientific, catalog # L34976) at a concentration of 0.3 $\mu$ L per 100 $\mu$ L of PBS. Cells were stained for 15 minutes at room temperature in the dark, washed once with flow buffer, and decanted.

Second, all other stains were applied in 100 $\mu$ L of flow buffer, and stained for 15 minutes at room temperature in the dark. To assess purity of selection, stains used were: CD45 (5 $\mu$ L) (BD Pharmingen, catalog #), CD19 (5 $\mu$ L) (BD Pharmingen, catalog #), and CD3 (5 $\mu$ L) (Thermo Fisher Scientific, catalog #5016228). Other flow antibodies include: PD-L1 (5 $\mu$ L) (Thermo Fisher Scientific, catalog #5011055), CD69 (2.5 $\mu$ L) (Beckman Coulter, catalog #6607110), PD-L2 (5 $\mu$ L) (Thermo Fisher Scientific, catalog #12-2799-42), CTLA-4 (5 $\mu$ L) (Thermo Fisher Scientific, catalog #25-1529-42), LAG-3 (5 $\mu$ L) (Thermo Fisher Scientific, catalog #25-2239-42), PD-1 (5 $\mu$ L) (Thermo Fisher Scientific, catalog # 12-2799-42). Flow cytometry data were analysed using Kaluza Analysis Software version 1.5 (Beckman Coulter).

### ***Other Reagents***

IFN $\gamma$  was blocked by application of anti-IFN $\gamma$  antibody (Peprotech, catalog #500-P32-100ug) to the co-culture immediately after plating at a concentration of 2ug/mL. Recombinant human IFN $\gamma$  (R&D Systems, catalog #285-IF-100) was used at the indicated concentrations for

the indicated timepoints. Ibrutinib was provided by Pharmacyclics, Inc., acalabrutinib was provided by AstraZeneca (formerly Acerta Pharma), and duvelisib was purchased through the Ohio State pharmacy. CD40 was blocked by application of lucatumumab (HCD-122) to the culture media immediately after plating at a concentration of 10ug/mL. RNA polymerase II was inhibited with  $\alpha$ -amanitin (Sigma-Aldrich, catalog #A2263) in a 1mg/mL suspension with DMSO.  $\alpha$ -amanitin was applied to MCL cells only for 3 hours at a concentration of 30ug/mL. Following incubation, cells were washed twice with PBS prior to plating with T-cells.

| <u>Patient Number</u> | <u>Sex</u> | <u>Age</u> | <u>MCL Variant</u> | <u>Prior therapy or Treatment Naïve (P or N)</u> | <u>Previous Treatment</u>                 |
|-----------------------|------------|------------|--------------------|--------------------------------------------------|-------------------------------------------|
| 1                     | M          | 55         | NA                 | N                                                | none                                      |
| 2                     | M          | 62         | Classical          | P                                                | FCR, BR, EPOCH                            |
| 3                     | M          | 66         | Classical          | P                                                | RCHOP, bortezomib, BR, lenalidomide, RICE |
| 4                     | M          | 66         | Classical          | P                                                | cyclophosphamide, BR, bortezomib, RCHOP   |
| 5                     | M          | 50         | Classical          | P                                                | BR and ASCT                               |
| 6                     | Unknown    |            |                    |                                                  |                                           |
| 7                     | M          | 81         | Classical          | N                                                | None                                      |
| 8                     | F          | 55         | Classical          | N                                                | None                                      |
| 9                     | M          | 71         | Classical          | P                                                | CHOP, BR                                  |
| 10                    | F          | 79         | Classical          | P                                                | CVP,FCR,PCR                               |
| 11                    | M          | 60         | Classical          | P                                                | CVAD                                      |
| 12                    | M          | 75         | unknown            | P                                                | RCHOP, ASCT                               |
| 13                    | Unknown    |            |                    |                                                  |                                           |
| 14                    | Unknown    |            |                    |                                                  |                                           |
| 15                    | M          | 66         | unknown            | P                                                | R-BAC                                     |
| 16                    | Unknown    |            |                    |                                                  |                                           |

**Key**

CHOP=Cyclophosphamide, doxorubicin, vincristine, prednisone

RCHOP=Rituximab and CHOP

BR=Bendamustine, rituximab

ASCT= Autologous stem cell transplant

FCR=Fludarabine, cyclophosphamide and rituximab

EPOCH=Etoposide, prednisone, vincristine, cyclophosphamide and doxorubicin

RICE=Rituximab, ifosfamide, carboplatin, etoposide

RBAC=Rituximab, bendamustine, cytarabine



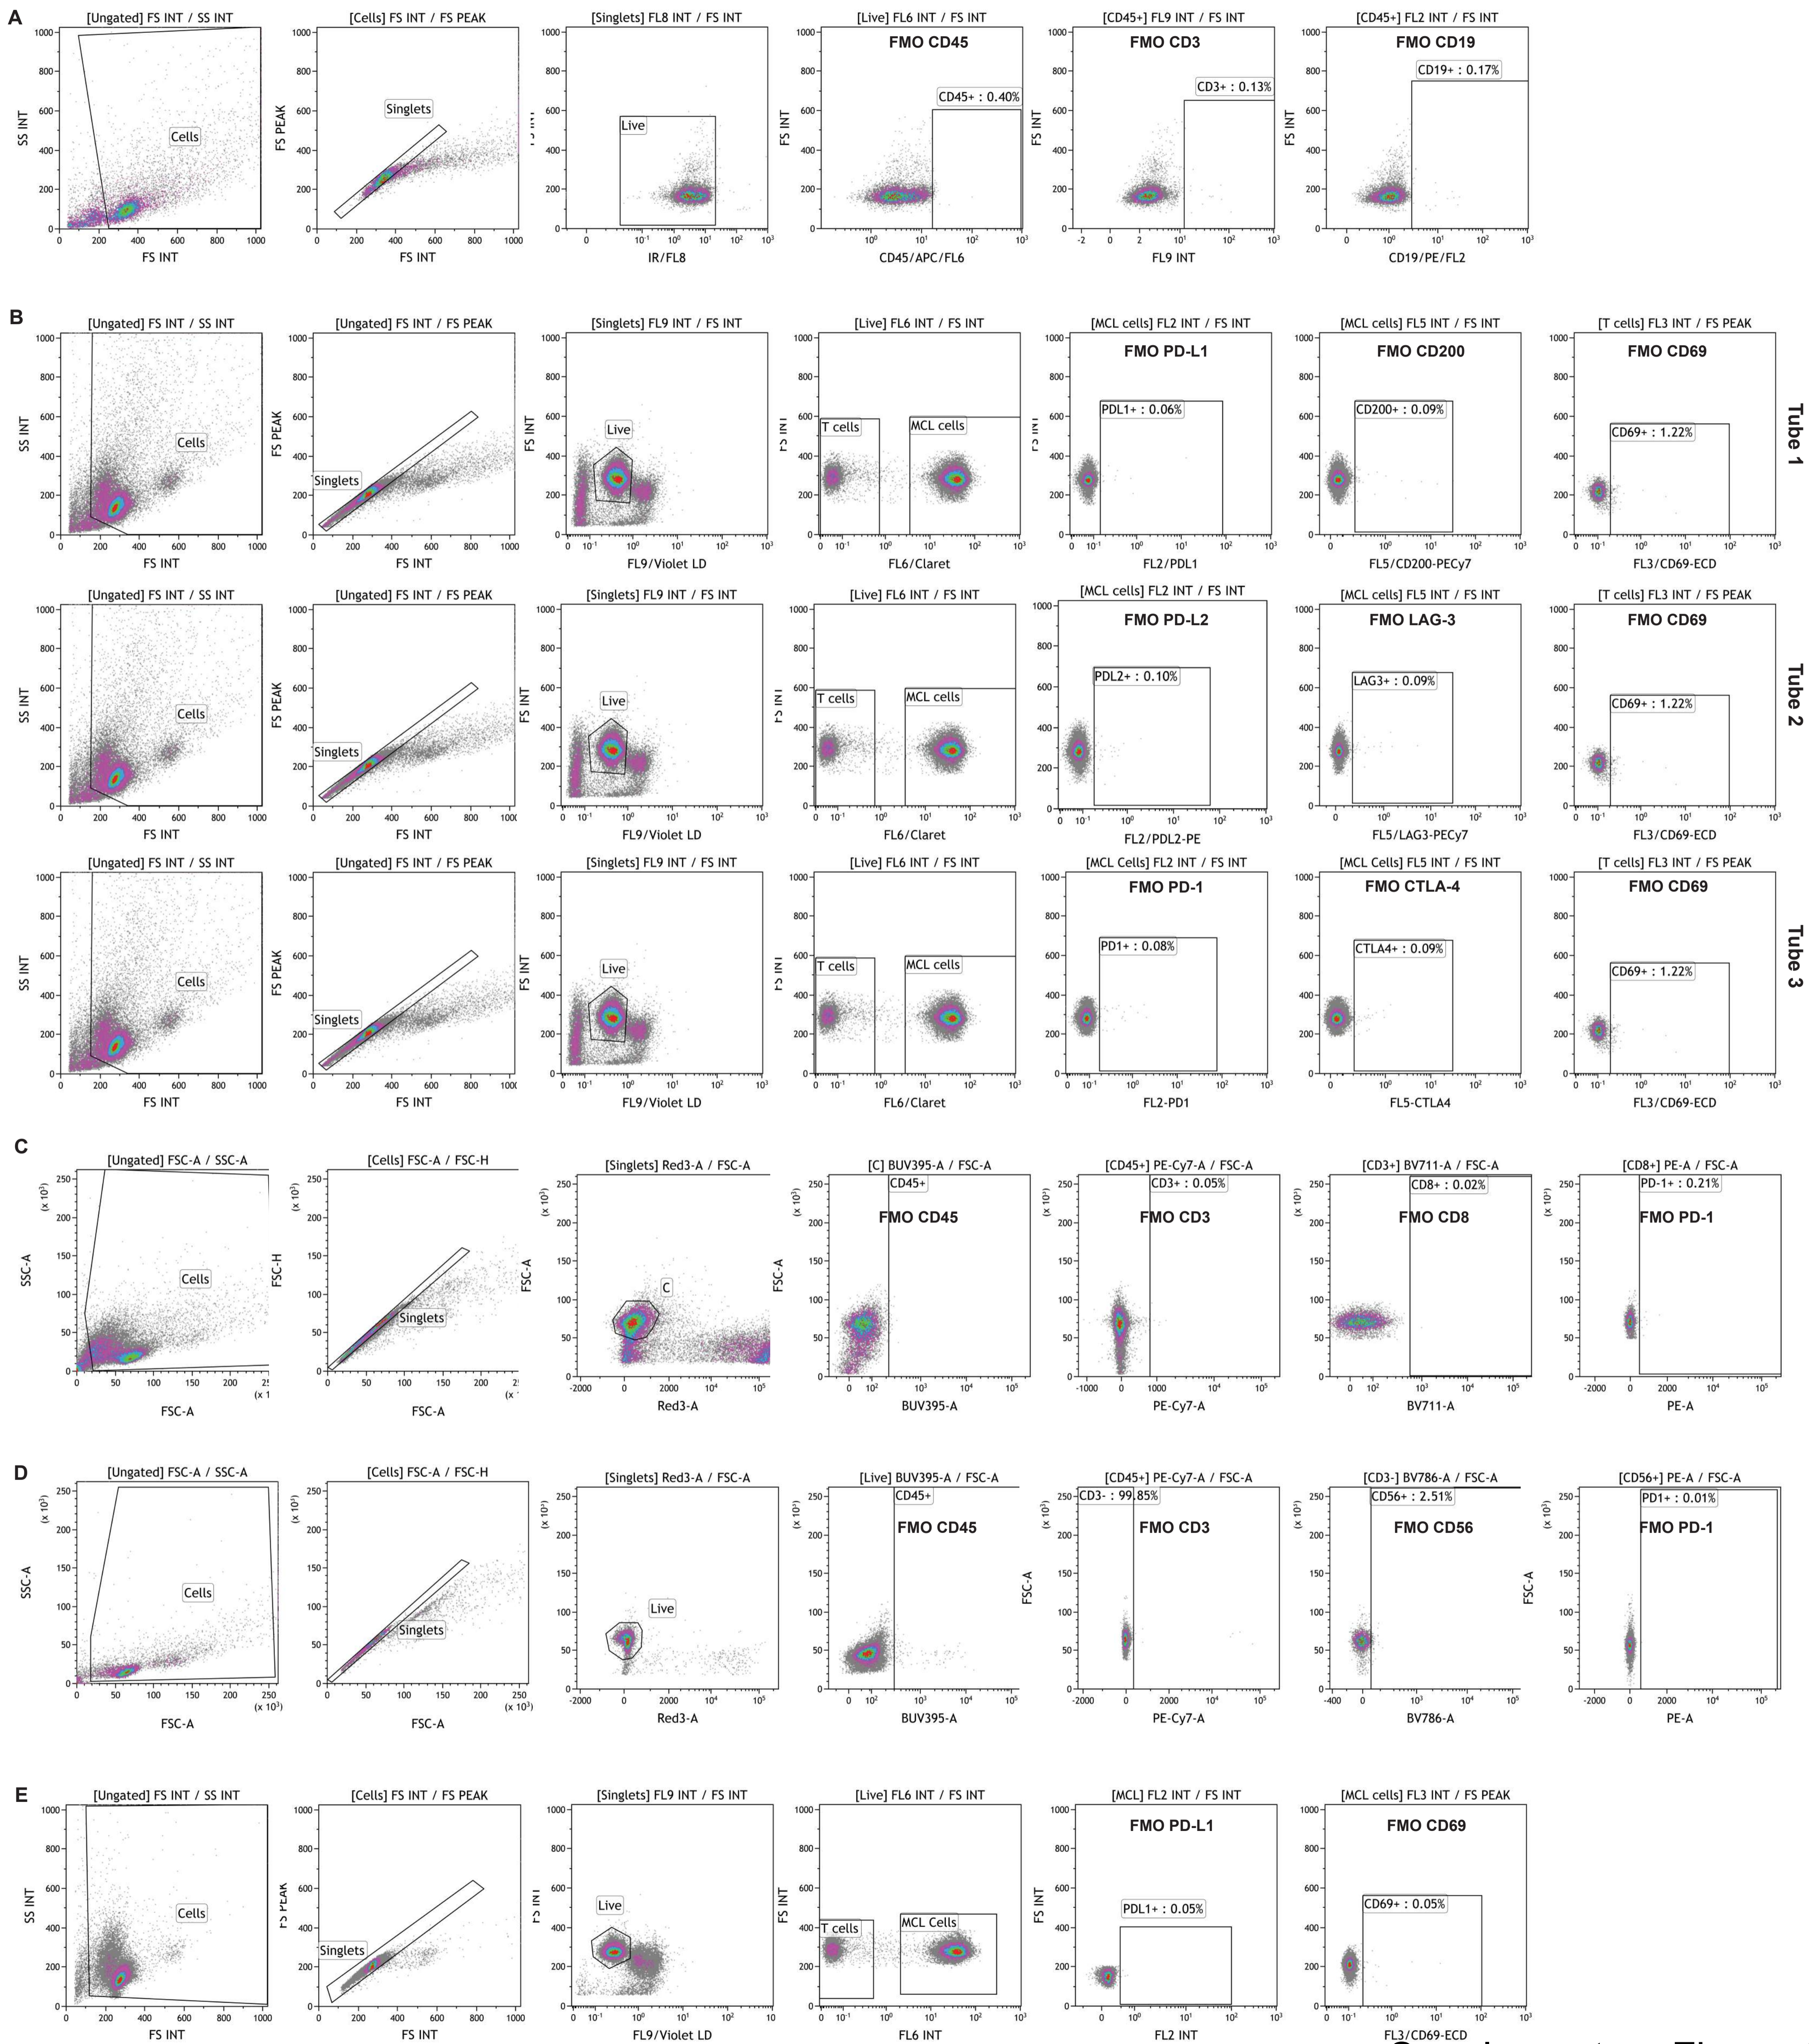

Supplementary Figure 1



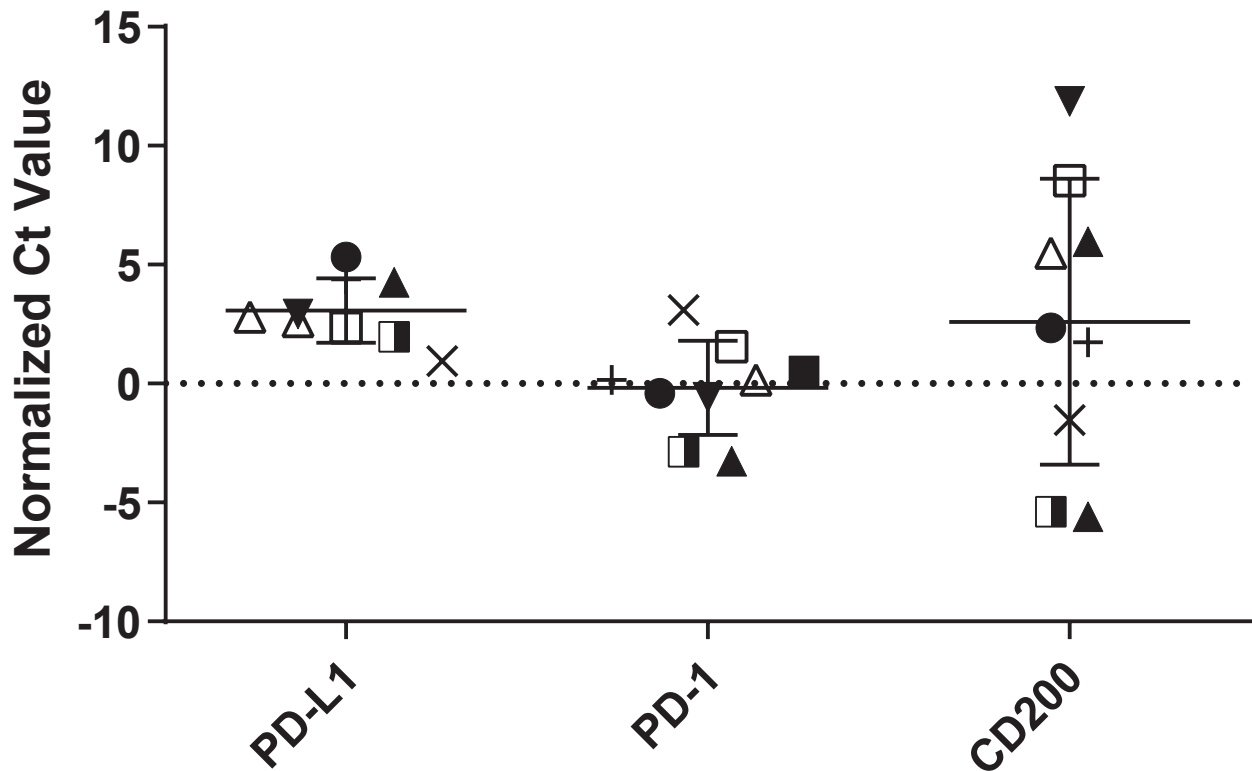

Supplementary Figure 2

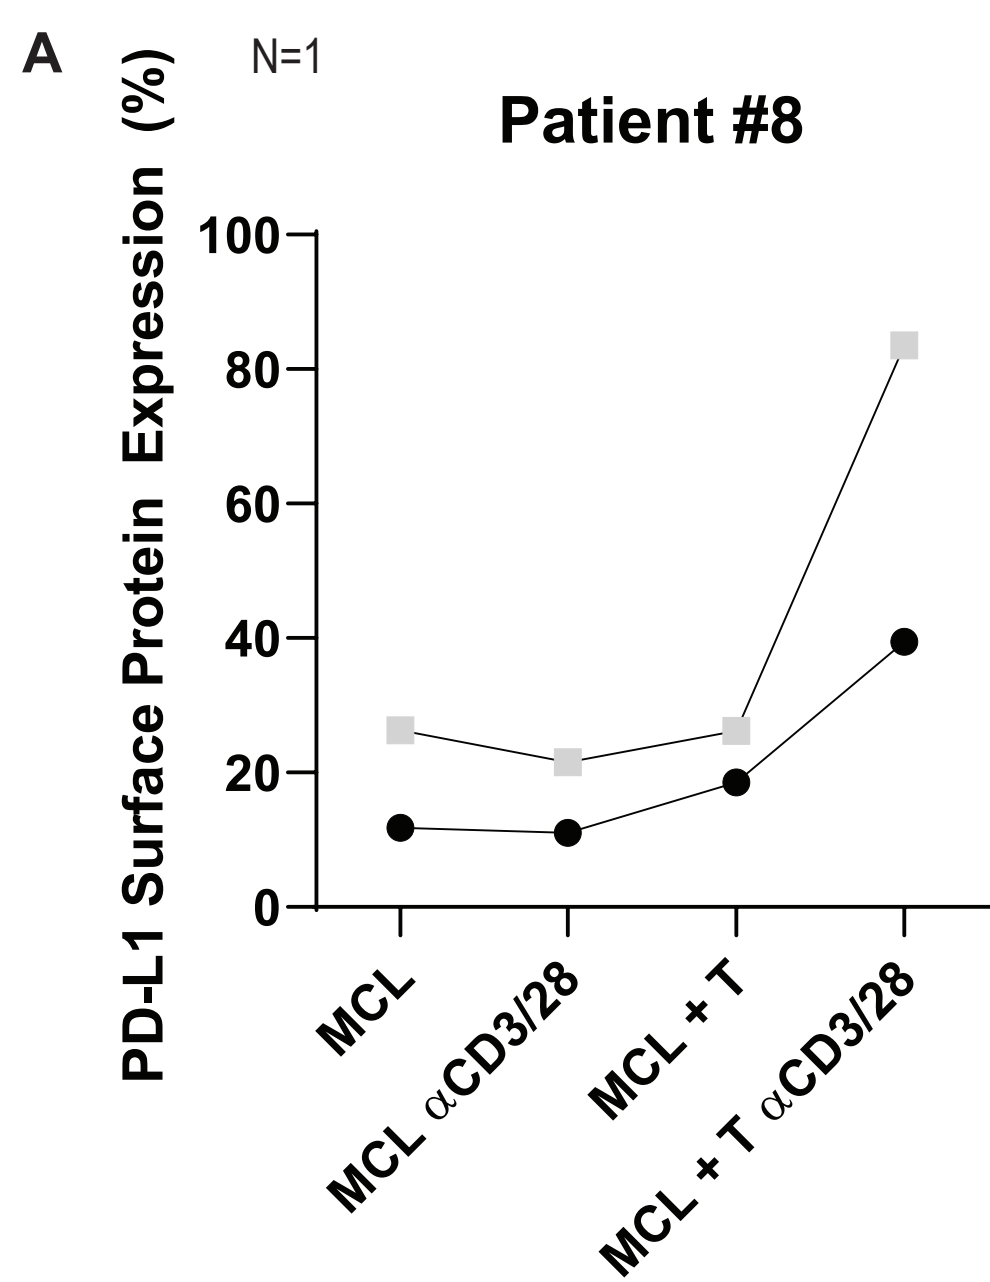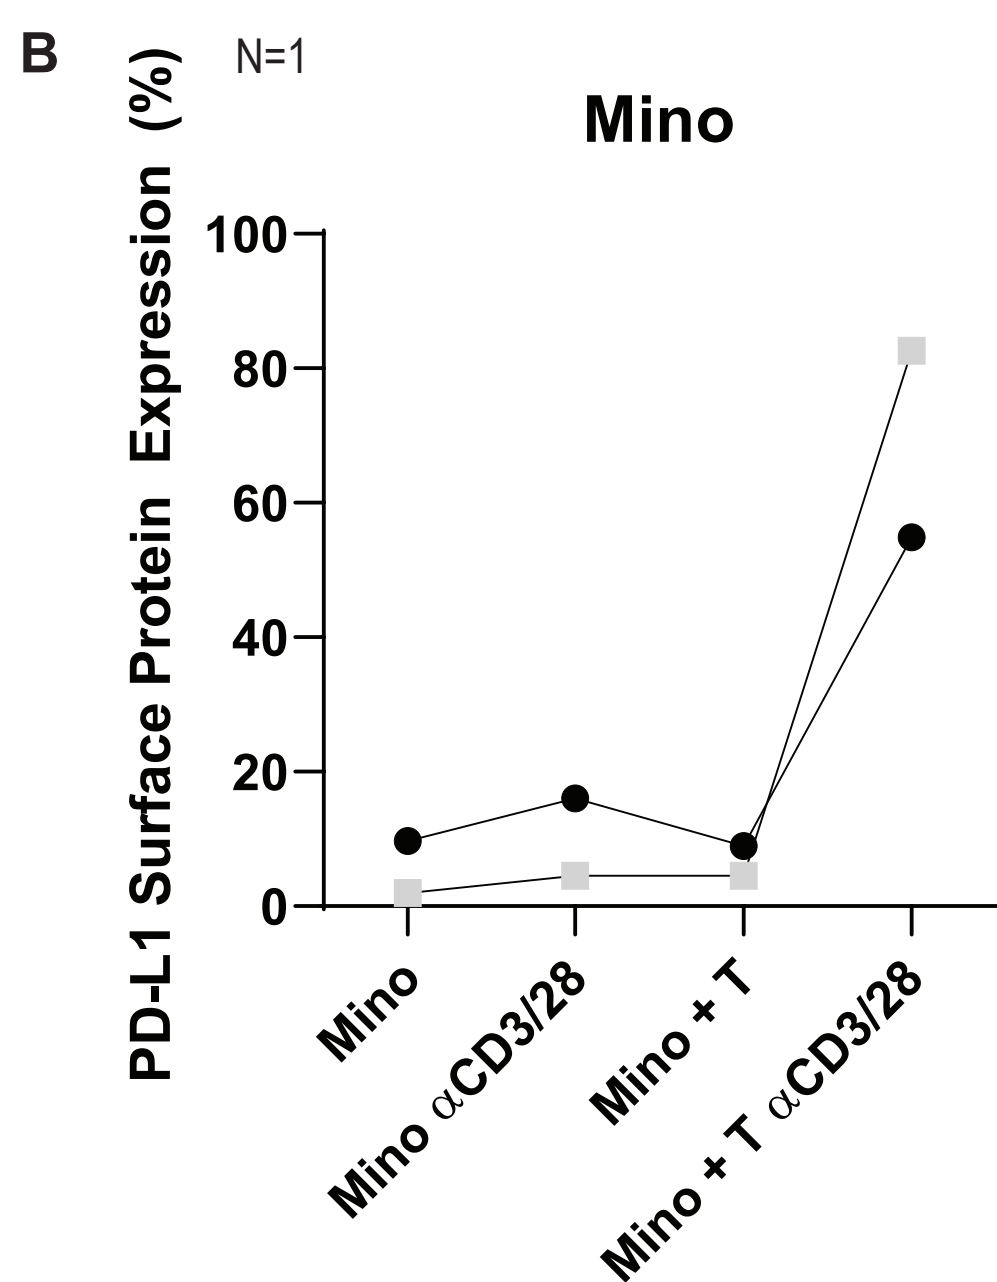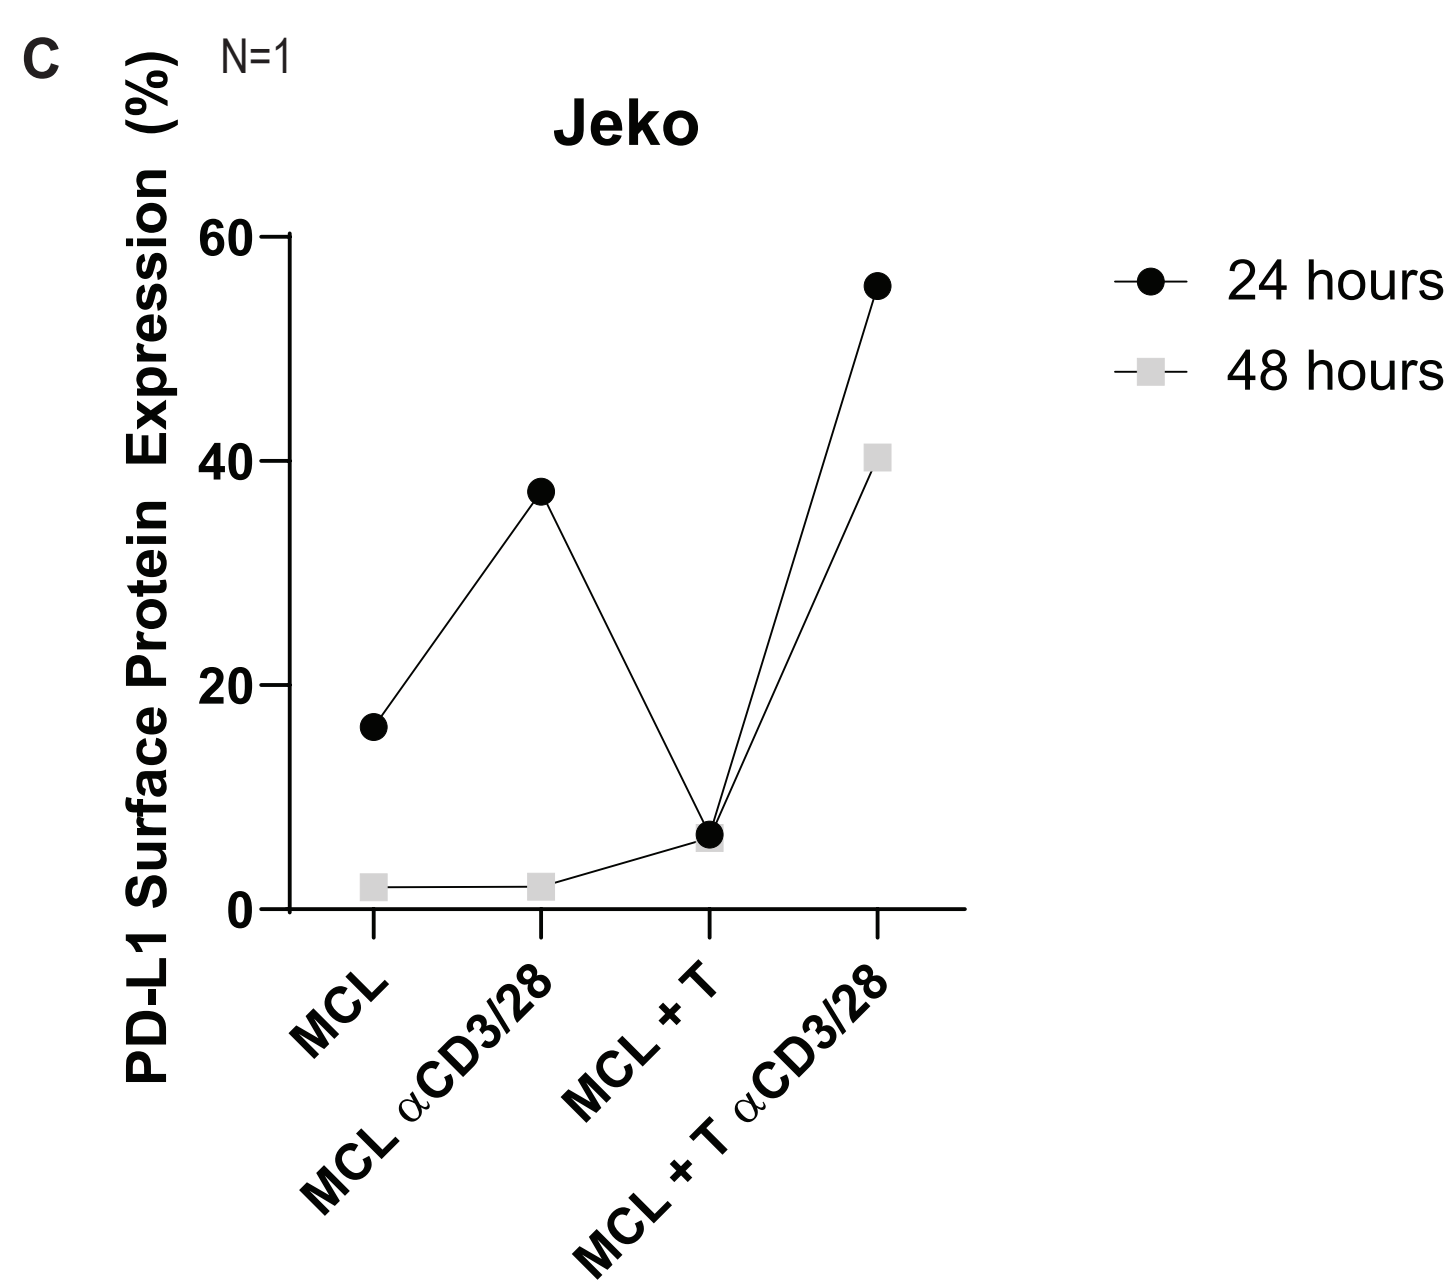

Supplementary Figure 3

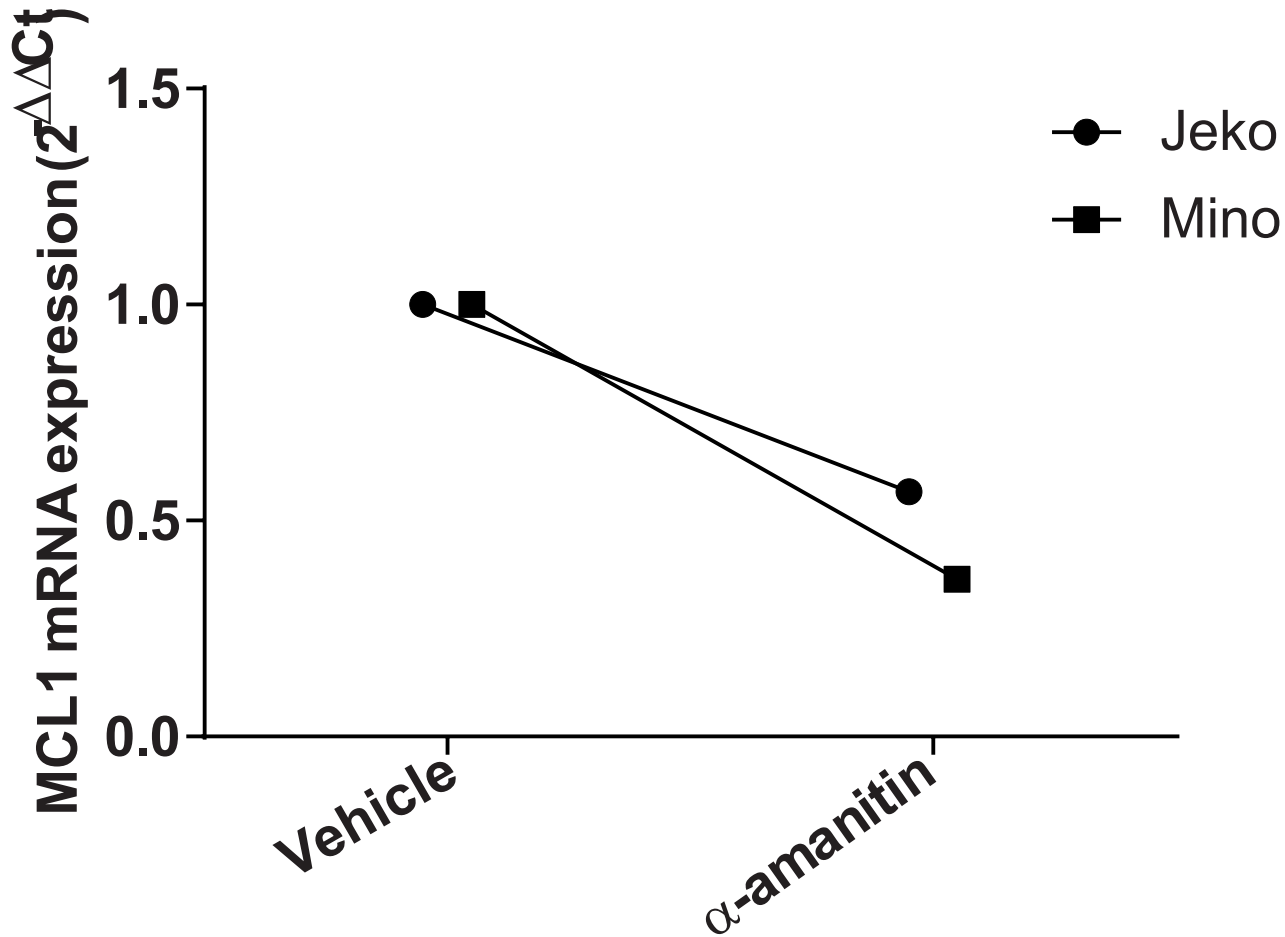

Supplementary Figure 4
